# Supplementary material
Source: PubMed Central journal article supplement (PMC2681398)
Supplement: supp_M800597-JLR200_Suppdata.pdf [file supp_M800597-JLR200_Suppdata.pdf]

**Supplementary Fig. 1. ApoA-I-dependence of ABCA1- and ABCB4-mediated lipid efflux.**

The efflux of cellular free cholesterol (A) and choline phospholipids (B) was analyzed. HEK/ABCA1-GFP cells, HEK/ABCA1-MM-GFP cells, and HEK/ABCB4 cells were incubated for 24 hours in DMEM containing 0.02% BSA (open bars) or 0.02% BSA and 5  $\mu\text{g/ml}$  apoA-I (hatched bars). Experiments were performed in triplicate, and the average values are represented with the S.E. \*\*,  $p < 0.001$ , significantly different from values in the presence of BSA.

**Supplementary Fig. 2. Effect of mutations on apoA-I binding to ABCA1-expressing cells.**

HEK/ABCA1-GFP, HEK/ABCA1-MM-GFP, or HEK/ABCA1-W590S-GFP cells were incubated with 5  $\mu\text{g/ml}$  Alexa-546-labeled apoA-I for 15 min at 37°C. Bar, 20  $\mu\text{m}$ .

**Supplementary Fig. 3. Time-dependence of ABCA1-mediated lipid efflux.**

The efflux of cellular free cholesterol (A) and choline phospholipids (B) was analyzed. HEK/ABCA1-GFP cells were incubated for 12 or 24 hours with DMEM containing 0.02% BSA, 0.02% BSA and 1 mM NaTC (filled bars), or 0.02% BSA and 5  $\mu\text{g/ml}$  apoA-I (hatched bars). NaTC- or apoA-I-dependent lipid efflux was calculated by subtracting the amount of lipid secreted into BSA. Experiments were performed in triplicate, and the average values are represented with the S.E. \*,  $p < 0.05$ ; \*\*,  $p < 0.001$ , significantly different from values at 12h.

**Supplementary Fig. 4. Effects of NaTC on the cellular viability.**

The LDH release to culture medium was analyzed. HEK cells, HEK/ABCA1-GFP cells, HEK/ABCA1-MM-GFP cells and HEK/ABCA1-W590S-GFP cells were incubated for 24 hours in DMEM containing

0.02% BSA (open bars) or 0.02% BSA and 1mM NaTC (filled bars). Experiments were performed in triplicate, and the average values are represented with the S.E.

**Supplementary Fig. 5. Lipid efflux to NaTC-PC complexes.** The efflux of cellular free cholesterol was analyzed. HEK cells and HEK/ABCA1-GFP cells were incubated for 24 hours in DMEM containing 0.02% BSA, 0.02% BSA and 1mM NaTC + 2  $\mu$ M PC, or 0.02% BSA and 1mM NaTC. The values for free cholesterol efflux from HEK/ABCA1-GFP cells were shown for comparison. Experiments were performed in triplicate, and the average values are represented with the S.E. \*\*,  $p < 0.001$ , significantly different from values in the presence of BSA.

**Supplementary Fig. 6. ABCA1-mediated lipid efflux at 27°C.** The efflux of cellular free cholesterol was analyzed. HEK/ABCA1-GFP cells, HEK/ABCA1-W590S-GFP cells, and HEK/ABCA1-MM-GFP cells were incubated for 8 hours in DMEM containing 0.02% BSA and 10  $\mu$ g/ml apoA-I at 27°C (open bars) or 37°C (filled bars). Experiments were performed in triplicate, and the average values are represented with the S.E.

**Supplementary Fig. 7. Time-dependent apoA-I binding to ABCA1-expressing cells.** Cells expressing ABCA1 or ABCA1-W590S, fused with GFP, were incubated with 5  $\mu$ g/ml Alexa-546-labeled apoA-I for the indicated times at 27°C. Bar, 20  $\mu$ m.

**Supplementary Fig. 8. Time-dependent apoA-I dissociation from ABCA1-expressing cells.** Cells expressing ABCA1 or ABCA1-W590S, fused with GFP, were incubated with 5

$\mu\text{g/ml}$  Alexa-546-labeled apoA-I for 15 min at  $37^\circ\text{C}$  and further incubated with  $25 \mu\text{g/ml}$  unlabeled apoA-I for the indicated times at  $27^\circ\text{C}$ . Bar,  $20 \mu\text{m}$ .

**A**

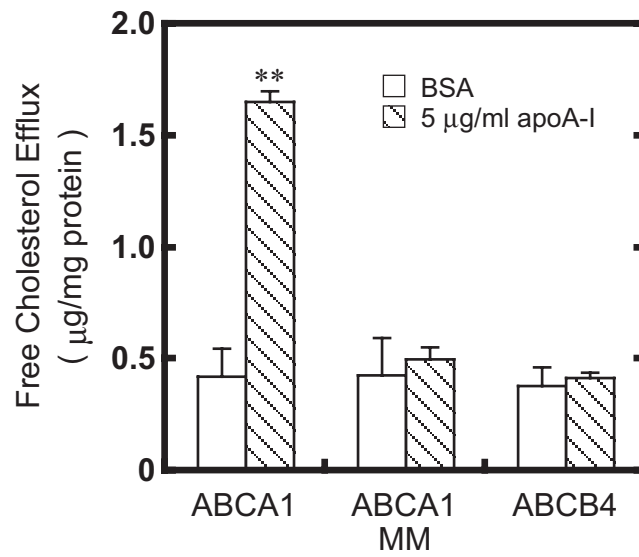

**B**

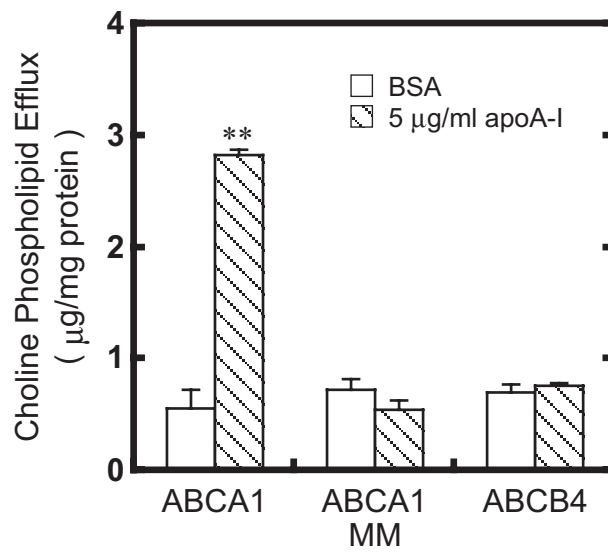

Supplementary Figure 1. Nagao, K et al.

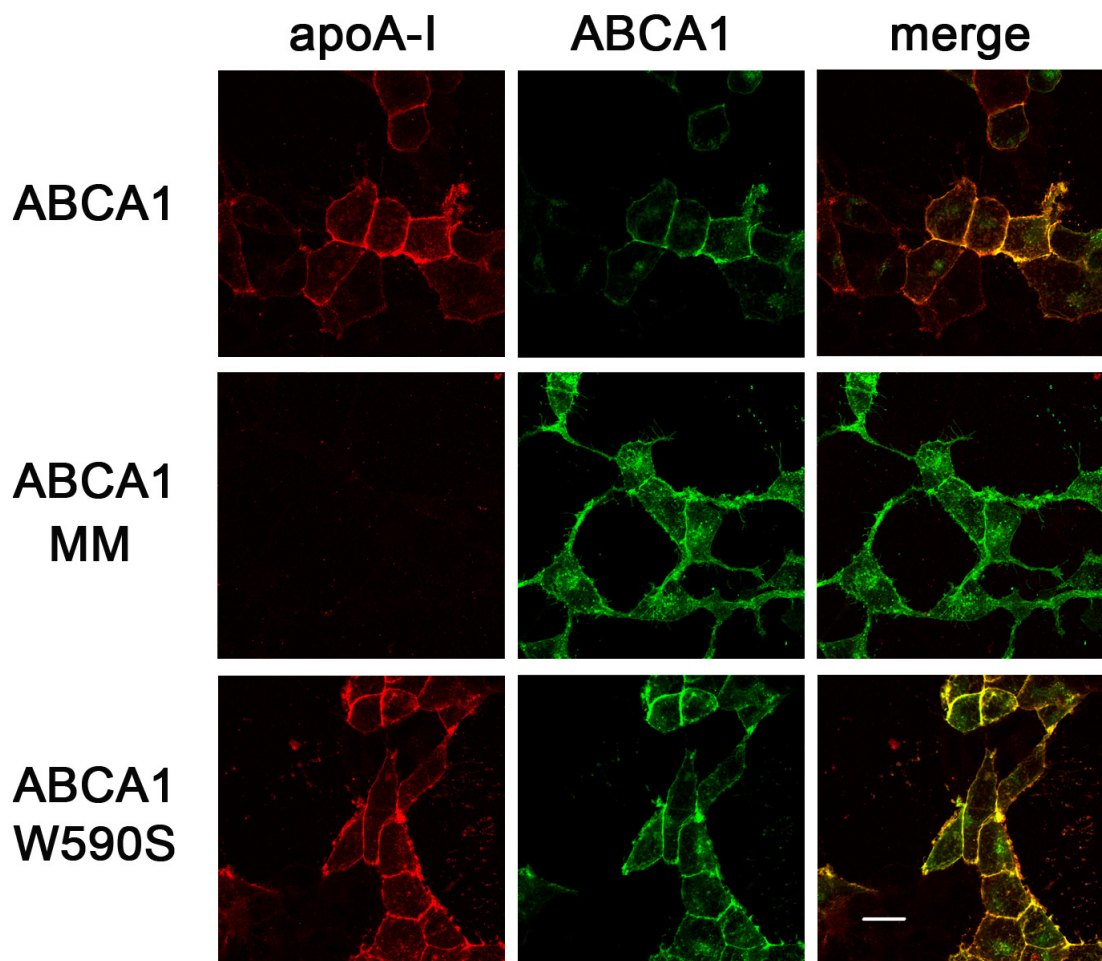

Supplementary Figure 2. Nagao, K et al.

A

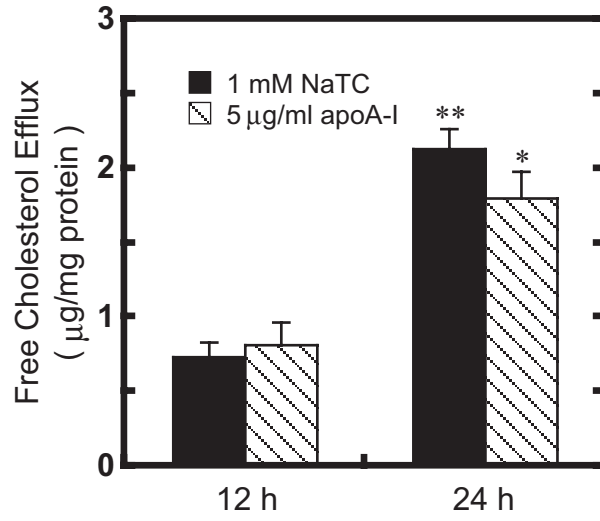

B

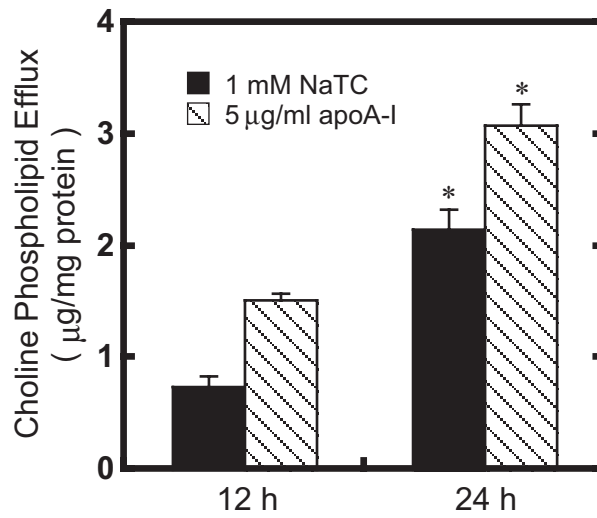

Supplementary Figure 3. Nagao, K et al.

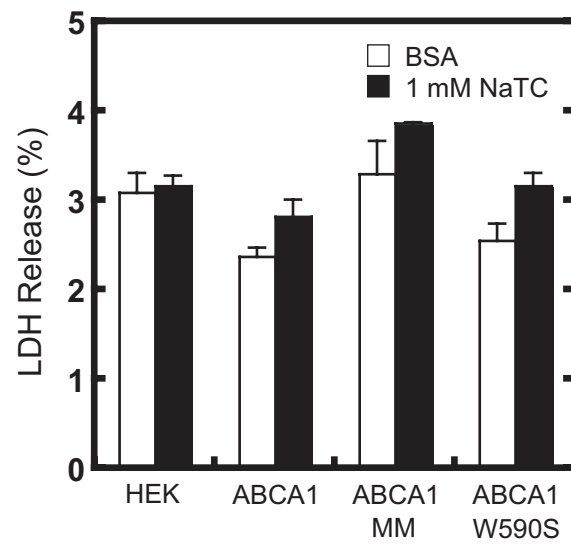

Supplementary Figure 4. Nagao, K et al.

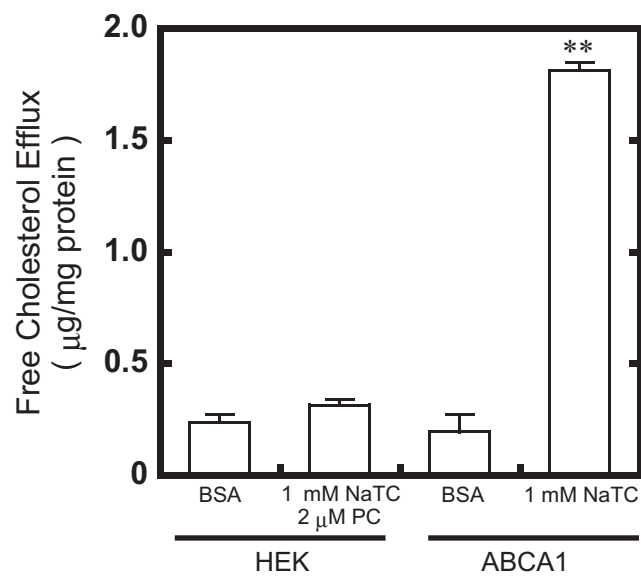

Supplementary Figure 5. Nagao, K et al.



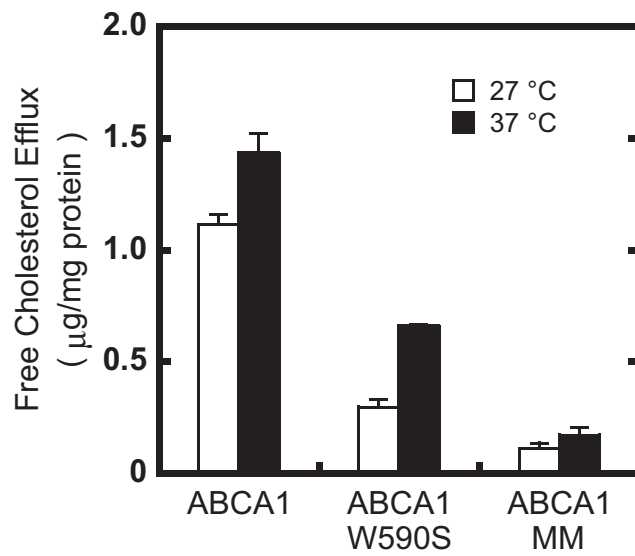

Supplementary Figure 6. Nagao, K et al.

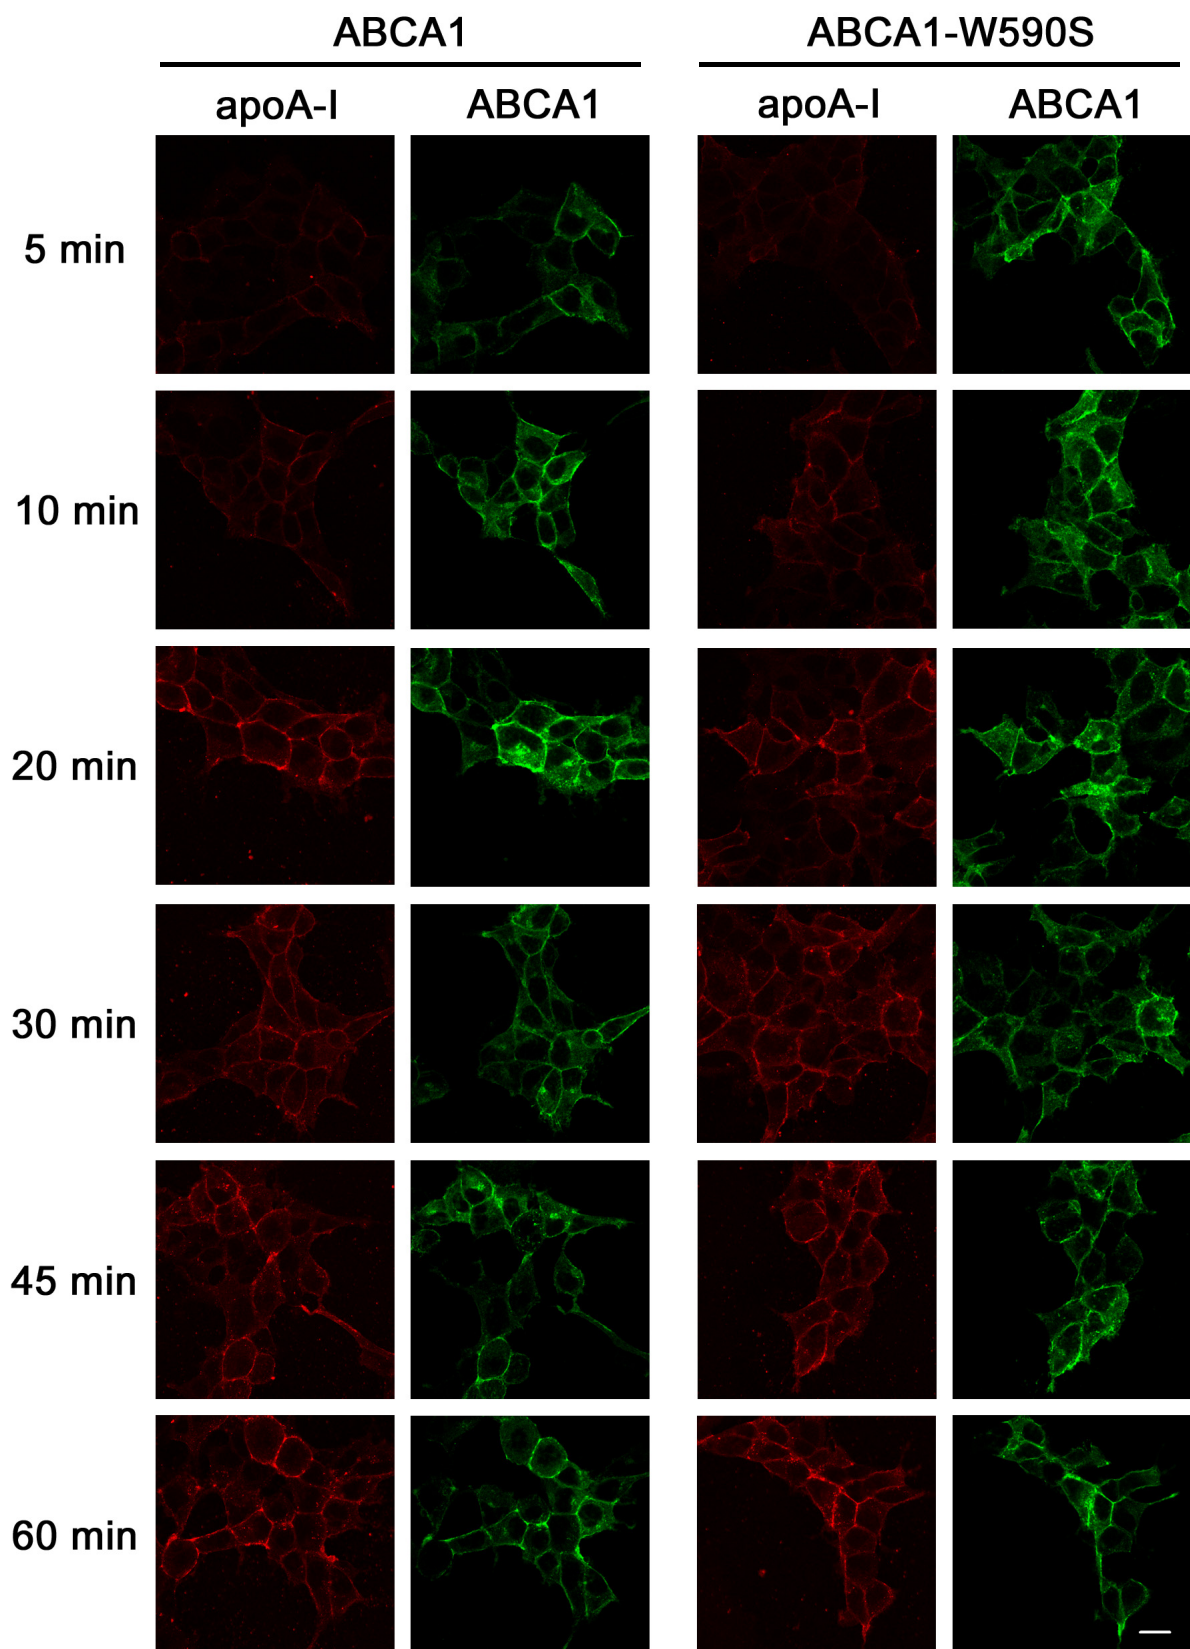

Supplementary Figure 7. Nagao, K et al.

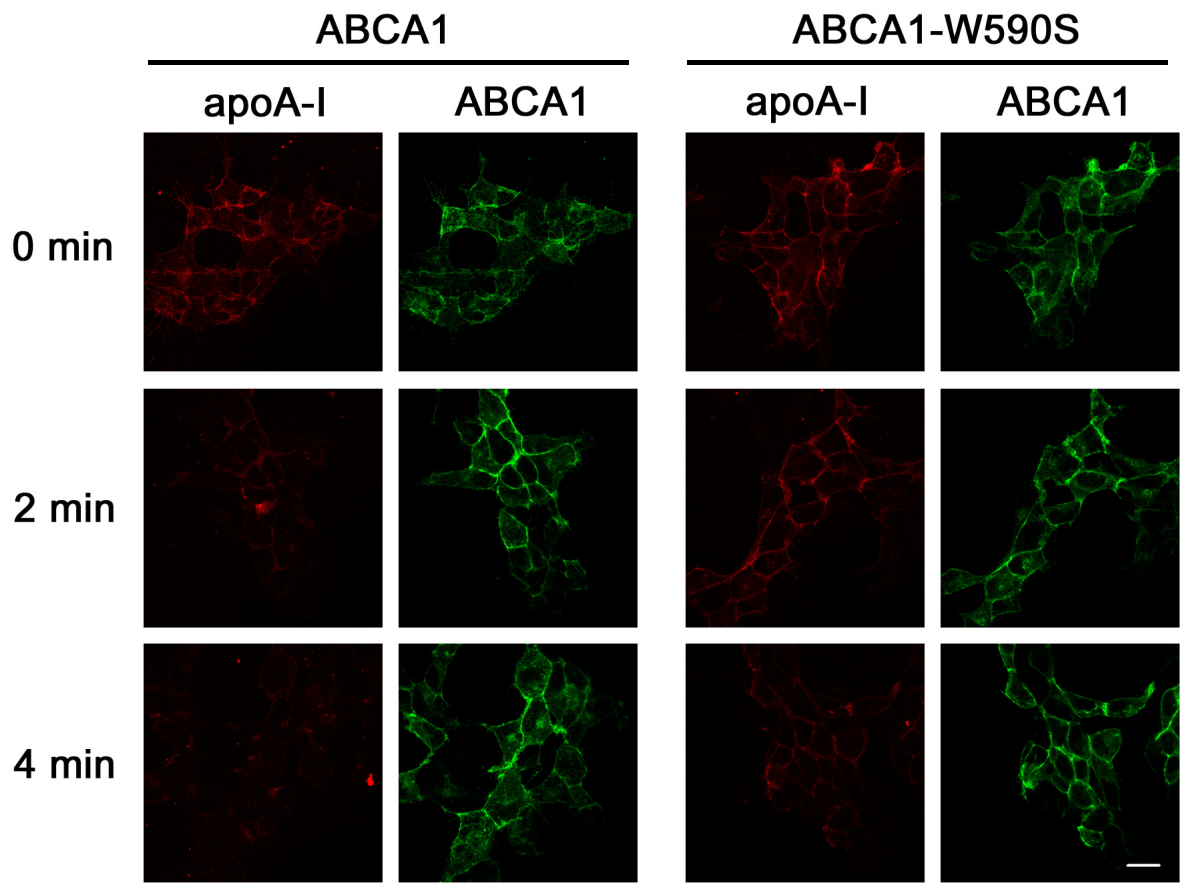

Supplementary Figure 8. Nagao, K et al.
